# Supplementary material for: Pulse-reverse electrodeposition for mesoporous metal films: combination of hydrogen evolution assisted deposition and electrochemical dealloying
Source: Royal Society of Chemistry journal article supplement (doi:10.1039/c1nr11503k), 2011-12-03
Supplement: c1nr11503k.pdf [file c1nr11503k.pdf]

## Pulse-Reverse Electrodeposition for Mesoporous Metal Films: Combination of Hydrogen Evolution Assisted Deposition and Electrochemical Dealloying

Serhiy Cherevko,<sup>\*a</sup> Nadiia Kulyk,<sup>a</sup> and Chan-Hwa Chung<sup>\*a</sup>

*Advanced Materials and Process Research Center for IT, School of Chemical Engineering,  
Sungkyunkwan University, Suwon 440-746, Republic of Korea.*

Fax: (+82) 31-290-7272; Tel: (+82) 31-290-7260;

E-mail: [s.cherevko@gmail.com](mailto:s.cherevko@gmail.com); [chchung@skku.edu](mailto:chchung@skku.edu)

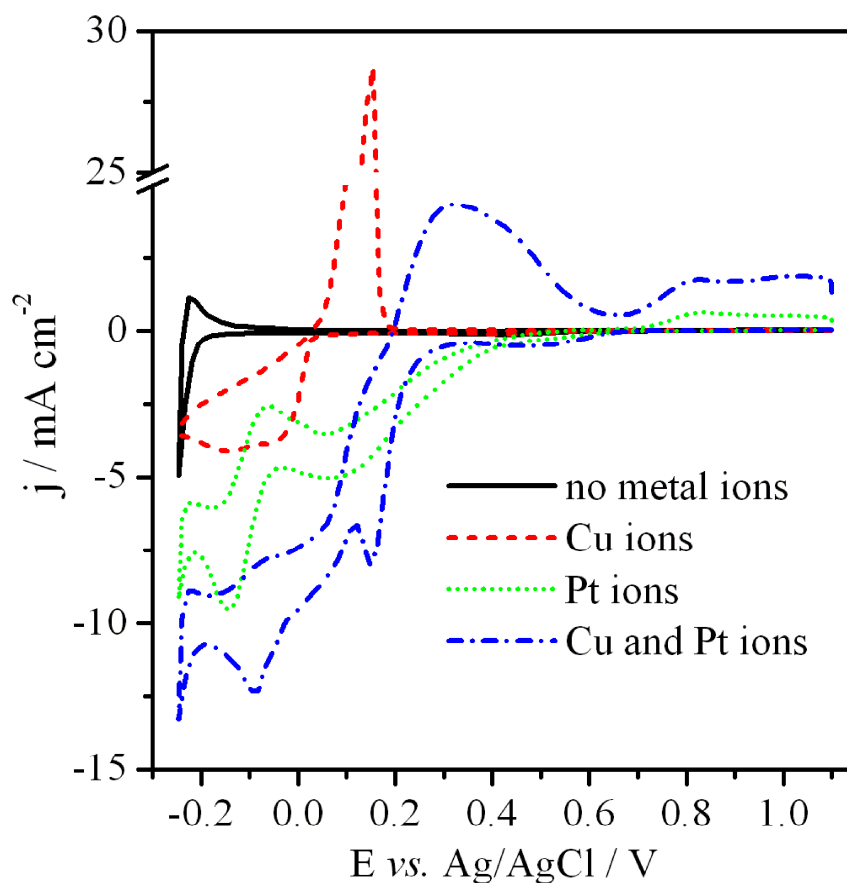

**Fig. S1.** CVs taken on a Pt/Ti/Si electrode in solutions containing no metal ions, Cu ions only, Pt ions only, and Cu and Pt ions. The scan rate was 20 mV s<sup>-1</sup>.

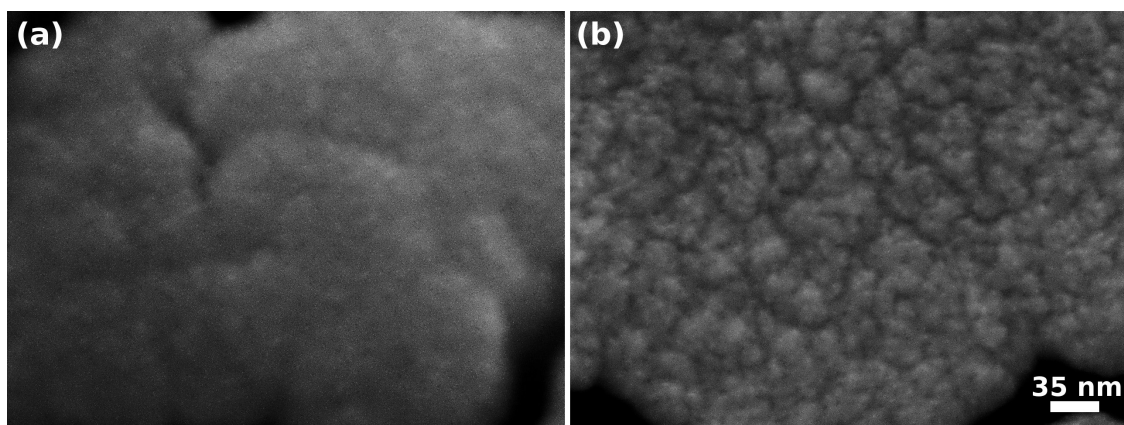

**Fig. S2.** SEM images taken from samples prepared in (a) PRPM (500 cycles,  $t_c = 0.1$  s,  $t_a = 0.3$  s) and (b) CPM.

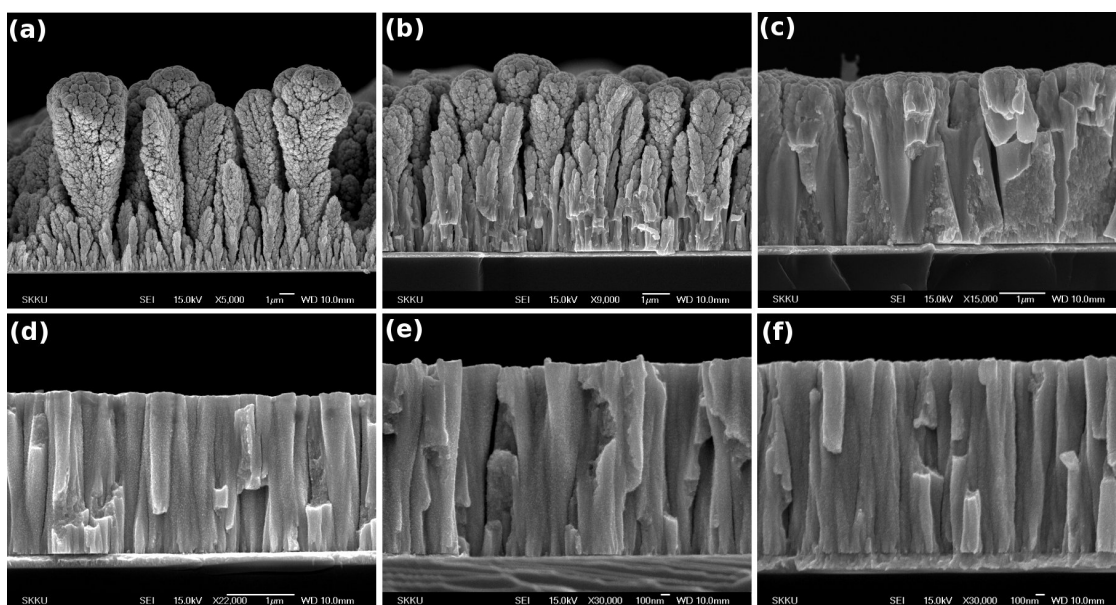

**Fig. S3.** SEM images showing cross-section views of films prepared when anodic pulse duration was (a) 0, (b) 0.05, (c) 0.1, (d) 0.5, (e) 1, (f) 2 seconds.

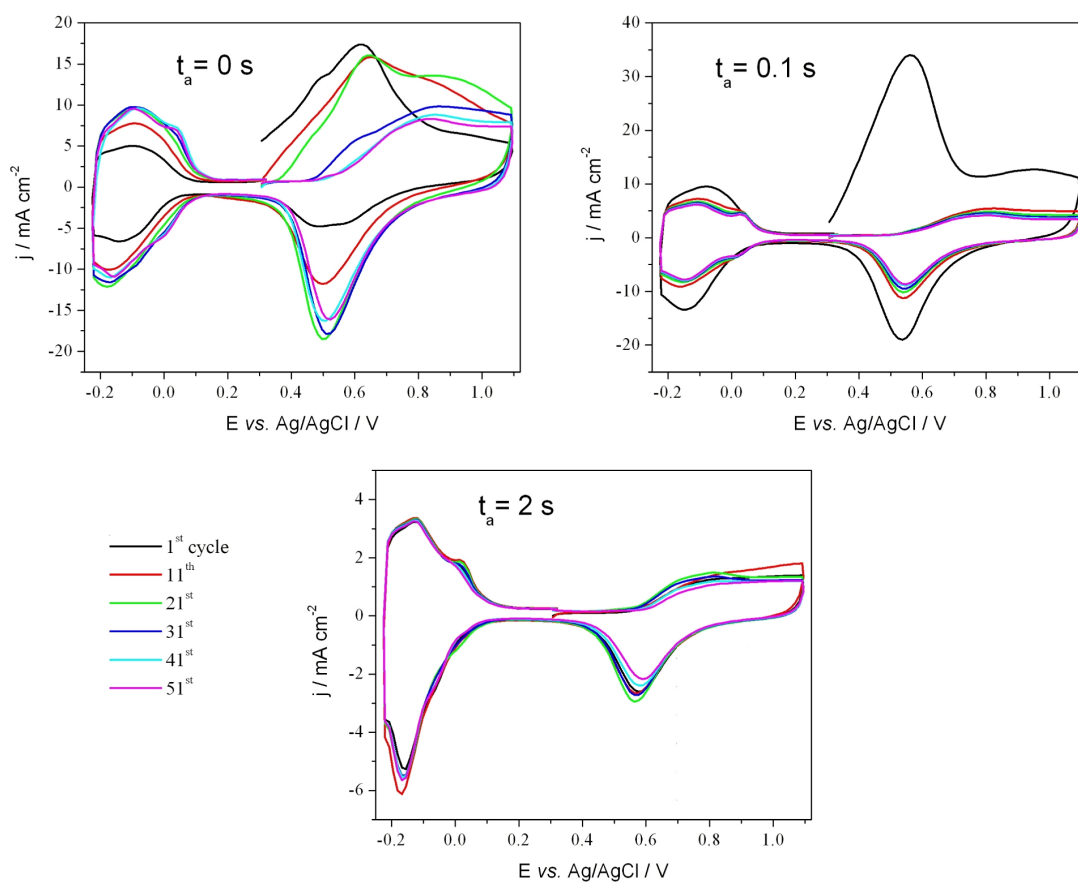

**Fig. S4.** Cyclic voltammograms showing the surface evaluation during the cycling (number are indicated). CVs were taken from the electrodes prepared with different anodic pulses. Scan rate was  $10 \text{ mV s}^{-1}$ .

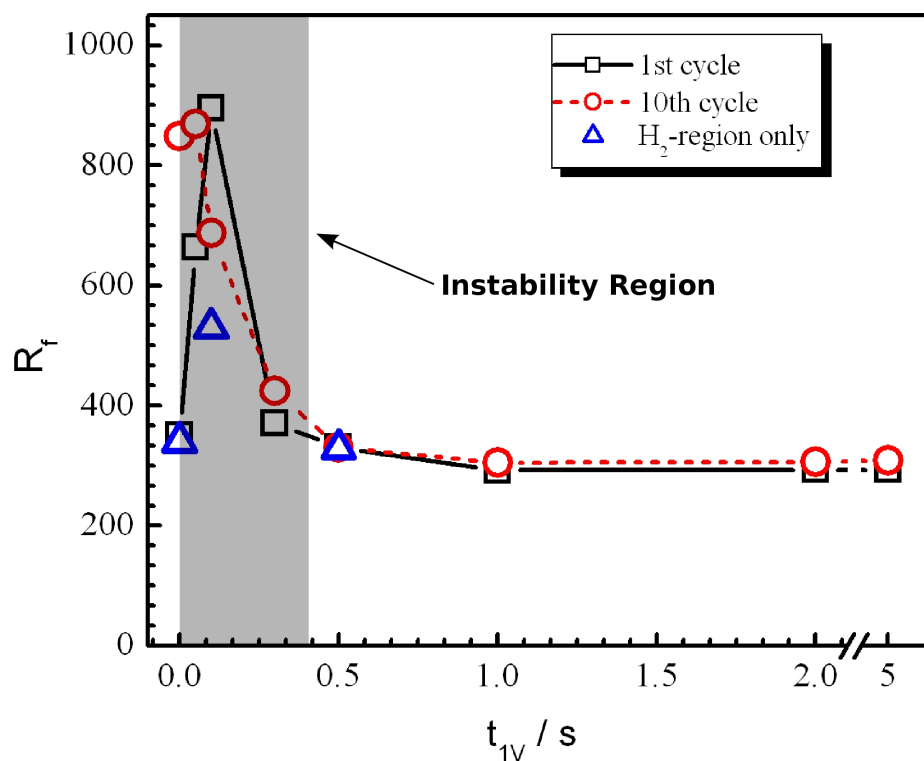

**Fig. S5.** Variation of film roughness factor on anodic pulse durations ( $E_a = 1V$ ).  $R_f$  was measured by cycling in broad potential window and  $H_2$  region only. Former one is presented by the data obtained from 1<sup>st</sup> and 10<sup>th</sup> cycles.

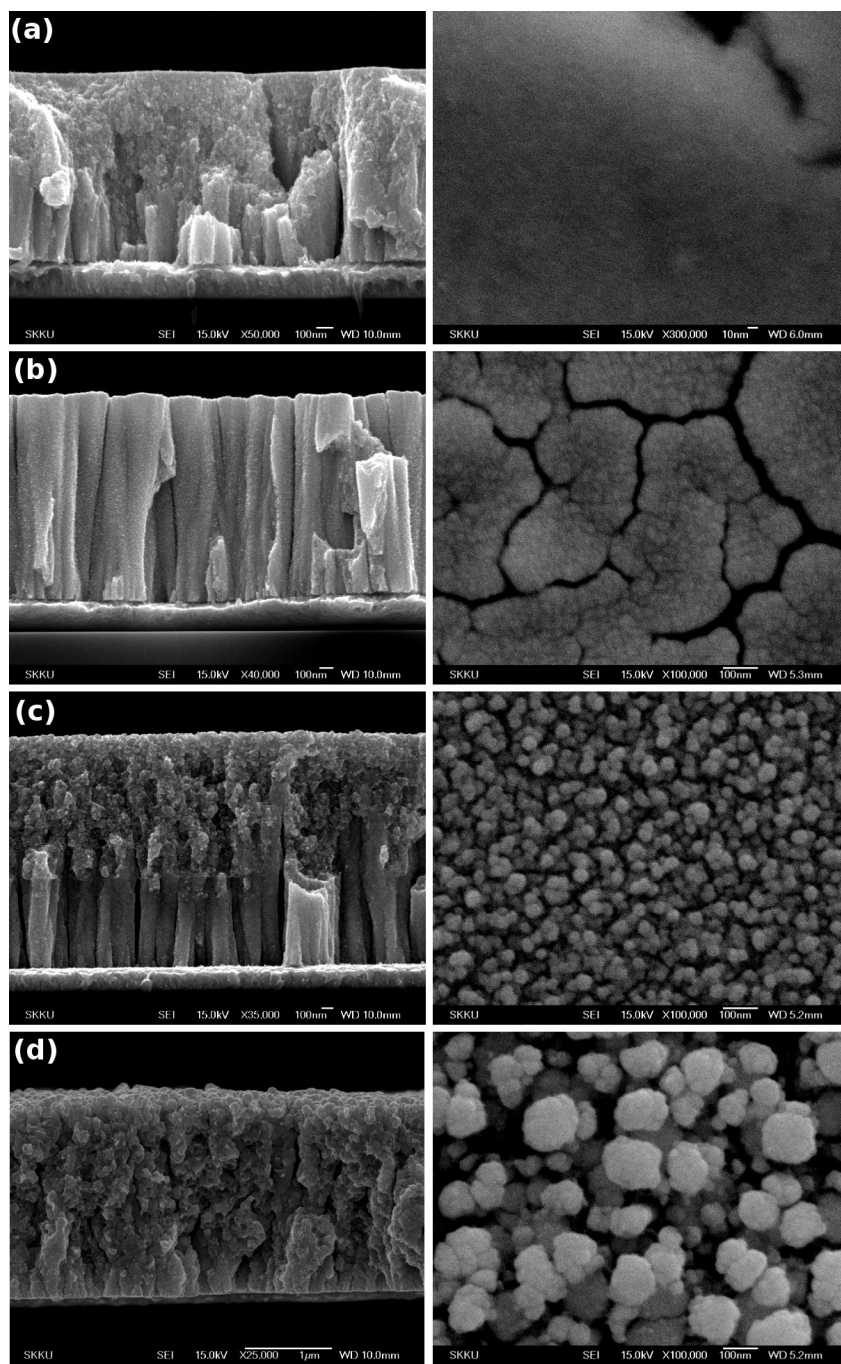

**Fig. S6.** SEM images showing cross-section (left panel) and top (right panel) views of films prepared when cathodic pulse duration was (a) 0.03, (b) 0.1, (c) 0.3, (d) 1 seconds.

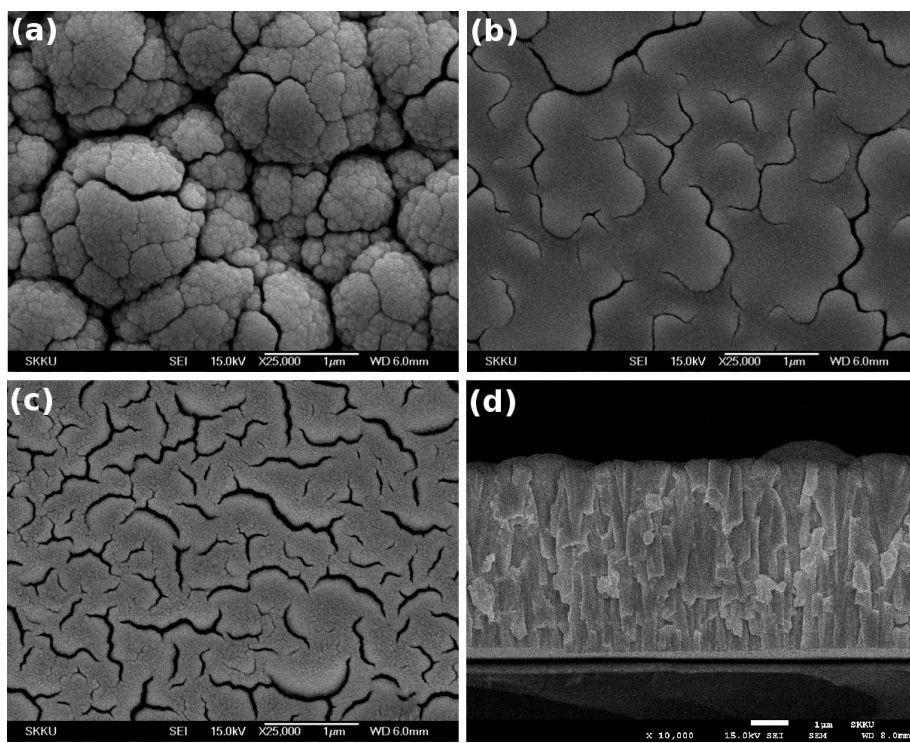

**Fig. S7.** SEM images of films formed when anodic potential was (a) 0.2, (b) 0.4, (c) 0.6, V. (d) Shows cross-section view of film presented in (a).
